# Supplementary material for: Assessing the Influence of OCT-A Device and Scan Size on Retinal Vascular Metrics
Source: PubMed Central journal article supplement — Transl Vis Sci Technol. 2020 Oct 7;9(11):7. doi: 10.1167/tvst.9.11.7 (PMC7545061; doi:10.1167/tvst.9.11.7), 2020-10-07
Supplement: tvst-9-11-7_s002.pdf [file tvst-9-11-7_s002.pdf]

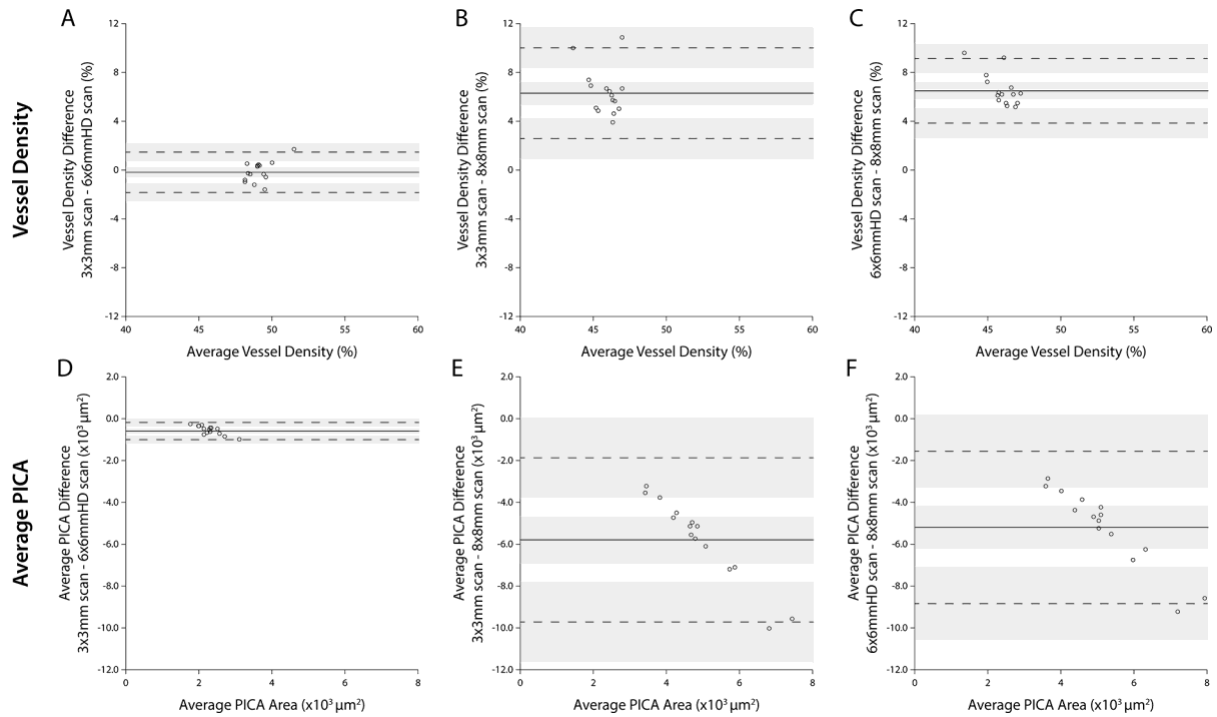

**Supplementary Figure 2.** Reproducibility of vessel morphometry metrics across the 3 scan sizes. Data are expressed in Bland-Altman plots showing scan size agreement in vessel morphometry metrics using data from 15 right eyes, using averaged images taken with AngioVue device. The top row compares vessel density with A) and D) comparing 3x3mm and 6x6mmHD scans, B) and E) comparing 3x3mm and 8x8mm scans, and C) and F) comparing 6x6mmHD and 8x8mm scans. Solid lines represent the mean difference (bias) between the devices, dotted lines represent limits of agreement (LOA), gray shading represents the 95% confidence intervals for the bias and LOAs for each device.
